# Supplementary material for: EphA2 Proteolytic Fragment as a Sensitive Diagnostic Biomarker for Very Early-stage Pancreatic Ductal Carcinoma
Source: PubMed Central journal article supplement (PMC10503484; doi:10.1158/2767-9764.crc-23-0087), 2023-09-15
Supplement: crc-23-0087-s01.pdf [file crc-23-0087-s01.pdf]

# Fig S1

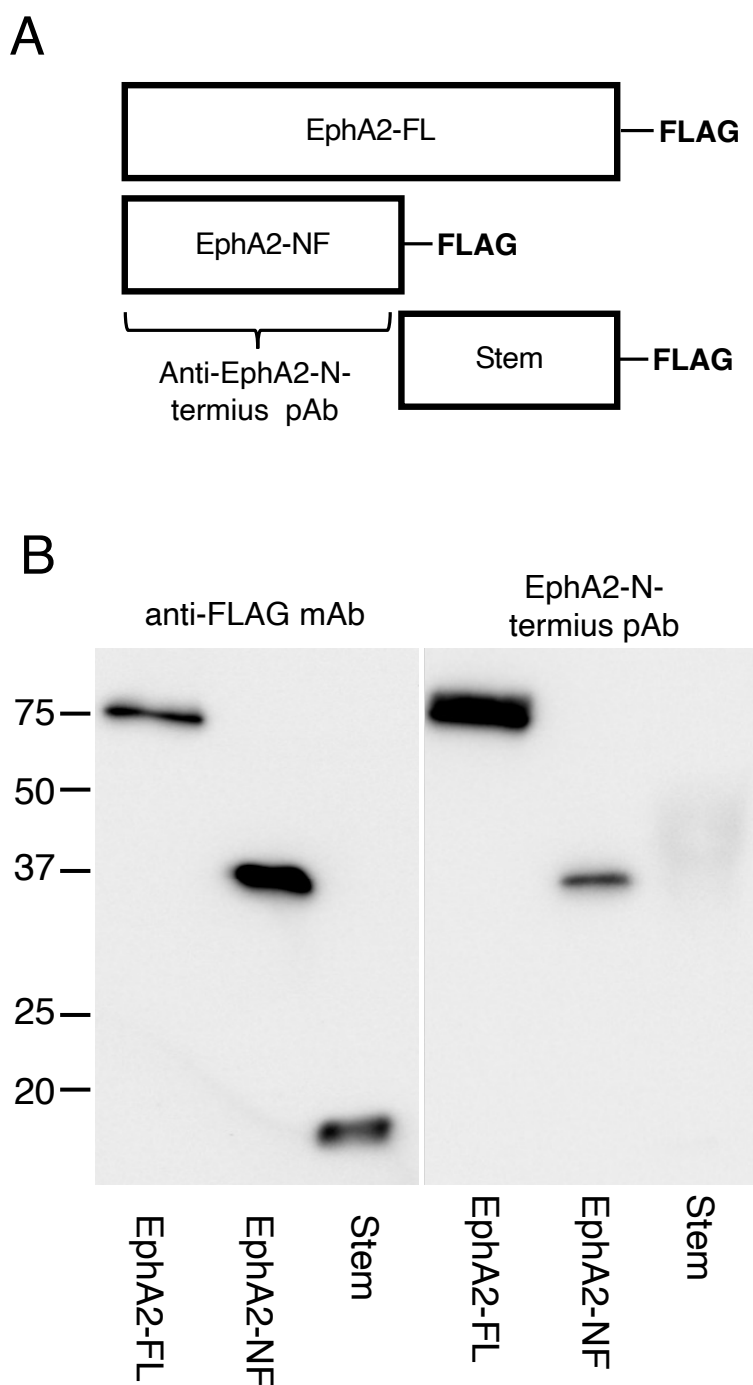

Figure S1.

(A) Schematic of recombinant EphA2-FL, EphA2-NF and stem portion. FLAG-tag was added at C-terminus. (B) These recombinant proteins were detected by anti-FLAG mAb and anti-EphA2-N-terminus pAb.
