# Supplementary material for: EphA2 Proteolytic Fragment as a Sensitive Diagnostic Biomarker for Very Early-stage Pancreatic Ductal Carcinoma
Source: PubMed Central journal article supplement (PMC10503484; doi:10.1158/2767-9764.crc-23-0087), 2023-09-15
Supplement: crc-23-0087-s02.pdf [file crc-23-0087-s02.pdf]

# Fig S2

## (A) PC vs HD

Cut off (Mean + SD)

|          | Cut off | PPV  | NPV  | TPF<br>(Sensitivity) | FPF<br>(1-Specificity) |
|----------|---------|------|------|----------------------|------------------------|
| EphA2-NF | 48.4    | 0.94 | 0.98 | 0.96                 | 0.96                   |
| CA19-9   | 25.9    | 0.94 | 0.85 | 0.74                 | 0.97                   |

Youden's index

|          | Cut off | PPV  | NPV  | TPF<br>(Sensitivity) | FPF<br>(1-Specificity) |
|----------|---------|------|------|----------------------|------------------------|
| EphA2-NF | 45.5    | 0.93 | 1.00 | 1.00                 | 0.95                   |
| CA19-9   | 24.8    | 0.93 | 0.89 | 0.81                 | 0.96                   |

## (B) PC vs IPMN + HD

Cut off (Mean + SD)

| Marker   | Cut off | PPV  | NPV  | TPF<br>(Sensitivity) | FPF<br>(1-Specificity) |
|----------|---------|------|------|----------------------|------------------------|
| EphA2-NF | 74.1    | 0.84 | 0.86 | 0.69                 | 0.94                   |
| CA19-9   | 37.0    | 0.92 | 0.89 | 0.74                 | 0.97                   |

Youden's index

| Marker   | Cut off | PPV | NPV  | TPF<br>(Sensitivity) | FPF<br>(1-Specificity) |
|----------|---------|-----|------|----------------------|------------------------|
| EphA2-NF | 59.8    | 0.8 | 0.93 | 0.86                 | 0.9                    |
| CA19-9   | 25.6    | 0.8 | 0.96 | 0.8                  | 0.96                   |

Figure S2.

Determination of cutoff value for CA19-9 and EphA2-NF. (A) PC vs HD and (B) PC vs IPMN + HD
