# Supplementary material for: EphA2 Proteolytic Fragment as a Sensitive Diagnostic Biomarker for Very Early-stage Pancreatic Ductal Carcinoma
Source: PubMed Central journal article supplement (PMC10503484; doi:10.1158/2767-9764.crc-23-0087), 2023-09-15
Supplement: crc-23-0087-s03.pdf [file crc-23-0087-s03.pdf]

Fig S3

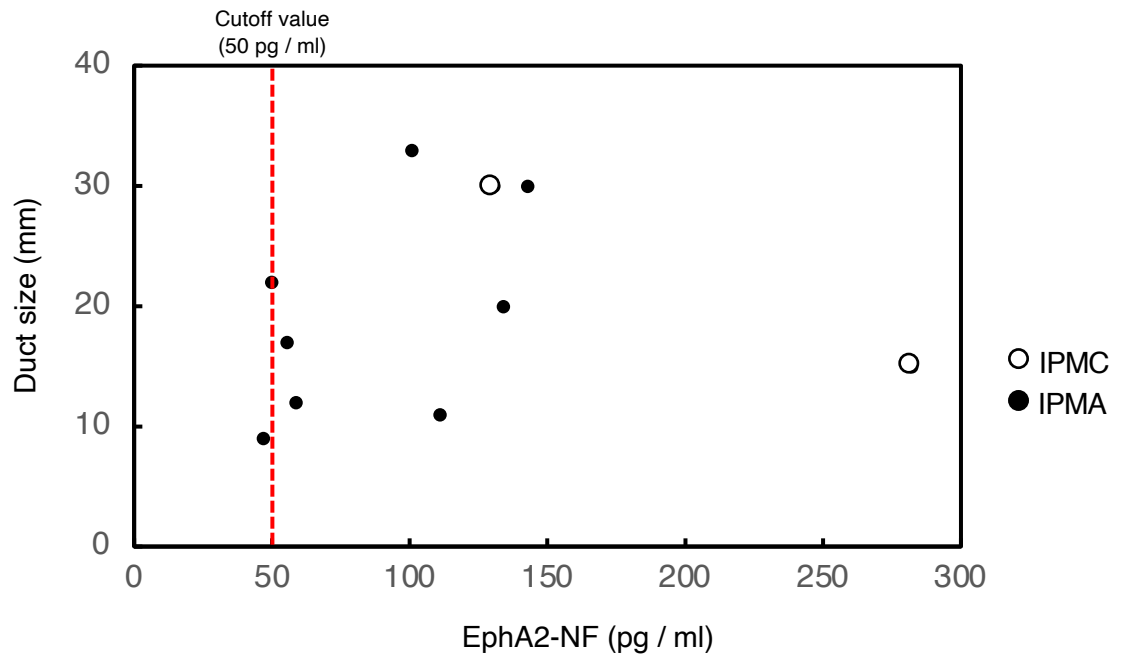

Figure S3.  
Correlation between serum EphA2-NF and pancreatic duct size in IPMN including IPMC.
