# Supplementary material for: EphA2 Proteolytic Fragment as a Sensitive Diagnostic Biomarker for Very Early-stage Pancreatic Ductal Carcinoma
Source: PubMed Central journal article supplement (PMC10503484; doi:10.1158/2767-9764.crc-23-0087), 2023-09-15
Supplement: crc-23-0087-s04.pdf [file crc-23-0087-s04.pdf]

# Fig S4

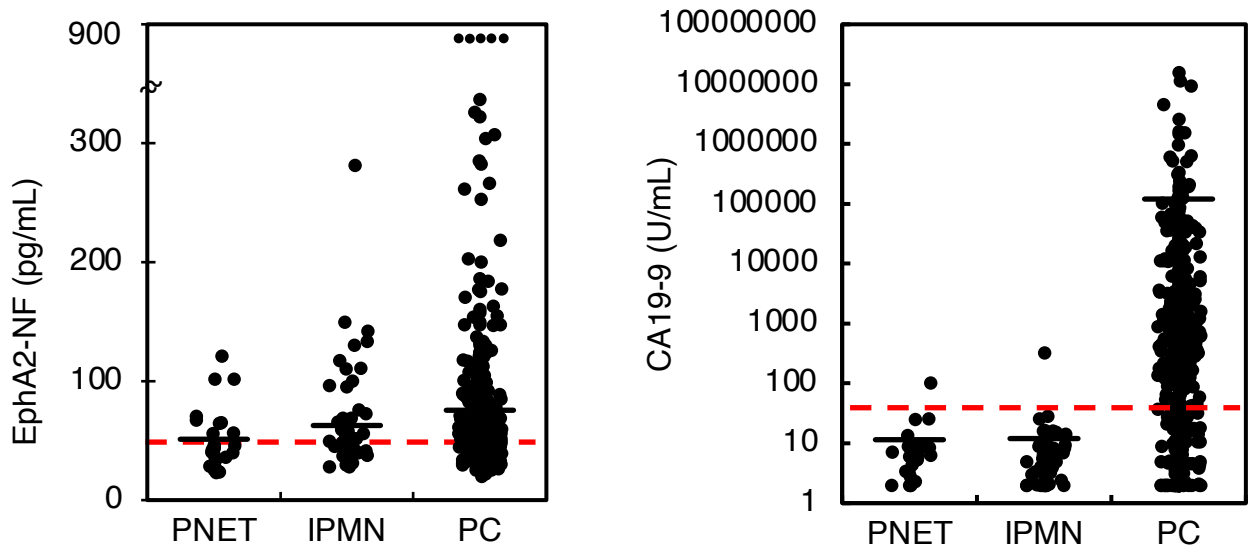

|      | N   | EphA2-NF |      | CA19-9   |           |
|------|-----|----------|------|----------|-----------|
|      |     | mean     | SD   | mean     | SD        |
| PNET | 25  | 51.2     | 25.9 | 11.5     | 20.0      |
| IPMN | 62  | 62.7     | 40.9 | 12.0     | 41.5      |
| PC   | 472 | 75.6     | 74.6 | 120422.9 | 1029305.2 |

Figure S4.

Dot blot analysis of PNET, IPMN and PC cases combined with test and validation cohorts. It became clear that serum EphA2-NF over the cutoff value existed in the benign pancreatic disease sera.
