# Supplementary material for: EphA2 Proteolytic Fragment as a Sensitive Diagnostic Biomarker for Very Early-stage Pancreatic Ductal Carcinoma
Source: PubMed Central journal article supplement (PMC10503484; doi:10.1158/2767-9764.crc-23-0087), 2023-09-15
Supplement: crc-23-0087-s05.pdf [file crc-23-0087-s05.pdf]

# Fig S5

## Stage I/II

|                  | EphA2-NF $\geq 50$ | EphA2-NF $< 50$ |
|------------------|--------------------|-----------------|
| CA19-9 $\geq 37$ | 35.0               | 29.0            |
| CA19-9 $< 37$    | 19.5               | 16.5            |

## Stage III/IV

|                  | EphA2-NF $\geq 50$ | EphA2-NF $< 50$ |
|------------------|--------------------|-----------------|
| CA19-9 $\geq 37$ | 56.6               | 24.3            |
| CA19-9 $< 37$    | 14.7               | 4.4             |

### Figure S5.

Comparison for the positive and negative ratios of CA19-9 and/or EphA2-NF in early-stage and late-stage PCs.
