# Supplementary material for: EphA2 Proteolytic Fragment as a Sensitive Diagnostic Biomarker for Very Early-stage Pancreatic Ductal Carcinoma
Source: PubMed Central journal article supplement (PMC10503484; doi:10.1158/2767-9764.crc-23-0087), 2023-09-15
Supplement: crc-23-0087-s08.pdf [file crc-23-0087-s08.pdf]

# Supplementary Table S3

|      | N   | EphA2-NF |      | CA19-9   |           |
|------|-----|----------|------|----------|-----------|
|      |     | mean     | SD   | mean     | SD        |
| PNET | 19  | 46.6     | 25.8 | 12.1     | 22.7      |
| IPMN | 16  | 46.9     | 17.3 | 7.4      | 6.9       |
| PC   | 472 | 75.6     | 74.6 | 120422.9 | 1029305.2 |

Serum EphA2-NF and CA19-9 in the validation cohort of patients with PC (n = 472), intraductal papillary mucinous neoplasms (IPMNs) (n = 16), and pancreatic neuroendocrine tumors (PNETs) (n = 19). The cutoff value for EphA2-NF and CA19-9 was defined as 50.0 pg / ml and 100 U / ml, respectively, from the test cohort analysis.
