# Supplementary material for: EphA2 Proteolytic Fragment as a Sensitive Diagnostic Biomarker for Very Early-stage Pancreatic Ductal Carcinoma
Source: PubMed Central journal article supplement (PMC10503484; doi:10.1158/2767-9764.crc-23-0087), 2023-09-15
Supplement: crc-23-0087-s09.pdf [file crc-23-0087-s09.pdf]

# Supplementary Table S4

| Stage | N   | EphA2-NF |      | CA19-9   |           |
|-------|-----|----------|------|----------|-----------|
|       |     | mean     | SD   | mean     | SD        |
| I     | 36  | 53.1     | 25.6 | 361.3    | 802.2     |
| II    | 164 | 67.8     | 86.1 | 1957.9   | 7242.8    |
| III   | 63  | 62.1     | 31.9 | 3357.0   | 6961.5    |
| IV    | 209 | 89.6     | 77.4 | 269349.4 | 1535914.8 |

Serum EphA2-NF and CA19-9 in PC sera from the validation cohort by stage.
