# Supplementary material for: EphA2 Proteolytic Fragment as a Sensitive Diagnostic Biomarker for Very Early-stage Pancreatic Ductal Carcinoma
Source: PubMed Central journal article supplement (PMC10503484; doi:10.1158/2767-9764.crc-23-0087), 2023-09-15
Supplement: crc-23-0087-s10.pdf [file crc-23-0087-s10.pdf]

# Supplementary Table S5

| Stage | N  | EphA2-NF (pg/mL) |       |
|-------|----|------------------|-------|
|       |    | Mean             | SD    |
| I     | 10 | 50.9             | 19.3  |
| II    | 15 | 65.3             | 23.9  |
| III   | 4  | 51.4             | 6.4   |
| IV    | 16 | 96.1             | 102.4 |

Serum EphA2-NF in CA19-9-negative patients with different stages.
