# Supplementary material for: EphA2 Proteolytic Fragment as a Sensitive Diagnostic Biomarker for Very Early-stage Pancreatic Ductal Carcinoma
Source: PubMed Central journal article supplement (PMC10503484; doi:10.1158/2767-9764.crc-23-0087), 2023-09-15
Supplement: crc-23-0087-s11.pdf [file crc-23-0087-s11.pdf]

# Supplementary Table S6

## Median survival time (Month)

|                    | EphA2-NF < 50 pg/mL | EphA2-NF $\geq$ 50 | P value |
|--------------------|---------------------|--------------------|---------|
| Surgical resection | 41.3                | 28.4               | 0.012   |
| Chemotherapy       | 17.2                | 10.1               | <0.001  |

Median survival time of PC patients treated with surgical resection and chemotherapy after classification into serum EphA2-NF high ( $\geq$ 50 pg / ml) and low (<50 pg / ml) groups.
