# Supplementary material for: EphA2 Proteolytic Fragment as a Sensitive Diagnostic Biomarker for Very Early-stage Pancreatic Ductal Carcinoma
Source: PubMed Central journal article supplement (PMC10503484; doi:10.1158/2767-9764.crc-23-0087), 2023-09-15
Supplement: crc-23-0087-s12.pdf [file crc-23-0087-s12.pdf]

# Supplementary Table S7

## Median survival time (Month)

|                    | CA19-9 < 37 U/mL | CA19-9 $\geq$ 37 U/mL | P-value |
|--------------------|------------------|-----------------------|---------|
| Surgical resection | 57.8             | 26.5                  | 0.002   |
| Chemotherapy       | 8.7              | 13.9                  | 0.370   |

Median survival time of PC patients treated with surgical resection and chemotherapy after classification into serum CA19-9 high ( $\geq 37$  U / ml) and low (<37 U / ml) groups.
