# Supplementary material for: EphA2 Proteolytic Fragment as a Sensitive Diagnostic Biomarker for Very Early-stage Pancreatic Ductal Carcinoma
Source: PubMed Central journal article supplement (PMC10503484; doi:10.1158/2767-9764.crc-23-0087), 2023-09-15
Supplement: crc-23-0087-s13.pdf [file crc-23-0087-s13.pdf]

# Supplementary Table S8

## Median survival time (Month)

| Treatment | EphA2-NF <50 pg/mL (n) | EphA2-NF $\geq$ 50 pg/mL (n) | P value |
|-----------|------------------------|------------------------------|---------|
| GnP       | 17.2 (56)              | 9.5 (151)                    | <0.001  |
| mFFX      | 16.3 (9)               | 15.3 (16)                    | 0.940   |

Median survival time of PC patients treated with gemcitabine and nab-paclitaxel (GnP) and modified FOLFIRINOX (oxaliplatin, irinotecan, and 5-fluorouracil, mFFX) after classification into serum EphA2-NF high ( $\geq$ 50 pg / ml) and low (<50 pg / ml) groups.
