# Supplementary material for: EphA2 Proteolytic Fragment as a Sensitive Diagnostic Biomarker for Very Early-stage Pancreatic Ductal Carcinoma
Source: PubMed Central journal article supplement (PMC10503484; doi:10.1158/2767-9764.crc-23-0087), 2023-09-15
Supplement: crc-23-0087-s14.pdf [file crc-23-0087-s14.pdf]

# Supplementary Table S9

## Median survival time (Month)

| Treatment | CA-19-9 <37 U / mL (n) | CA19-9 $\geq$ 37 U / mL (n) | P value |
|-----------|------------------------|-----------------------------|---------|
| GnP       | 8.1 (39)               | 13.7 (168)                  | 0.695   |
| mFFX      | 17.5 (5)               | 15.3 (20)                   | 0.525   |

Median survival time of PC patients treated with GnP (G) and mFFX (F) classified into CA19-9 high ( $\geq$ 37 U / ml) and low (<37 U / ml) groups.
