# Supplementary material for: EphA2 Proteolytic Fragment as a Sensitive Diagnostic Biomarker for Very Early-stage Pancreatic Ductal Carcinoma
Source: PubMed Central journal article supplement (PMC10503484; doi:10.1158/2767-9764.crc-23-0087), 2023-09-15
Supplement: crc-23-0087-s15.pdf [file crc-23-0087-s15.pdf]

# Supplementary Table S10

|                              | Coexistence of PC in IPMN |    | <i>p</i> value         |
|------------------------------|---------------------------|----|------------------------|
|                              | +                         | -  |                        |
| <b>ASR<math>\geq</math>1</b> | 0                         | 8  | <b><i>p</i> = 0.03</b> |
| <b>ASR&lt;1</b>              | 19                        | 31 |                        |

Statistical analysis of the Allred score ratio (ASR) of IPMN with and without PC. The chi-square test was performed.
